# Supplementary material for: Insight into the synthesis, structure affirmation and catalytic efficiency of divalent and trivalent metal chelates of mandelic acid hydrazone derivative
Source: Royal Society of Chemistry journal article supplement (doi:10.1039/d4ra05769d), 2024-01-01
Supplement: d4ra05769d1.pdf [file d4ra05769d1.pdf]

1 **Insight into the synthesis, structure affirmation and catalytic efficiency of divalent**  
2 **and trivalent metal chelates of mandelic acid hydrazone derivative**

3

4 **Hoda A. El-Ghamry<sup>1\*</sup>, Mohamed Gaber<sup>1</sup>, Fatmah M Alkhatib<sup>2</sup>, Hossa F. Al Shareef<sup>2</sup>, Khadiga M.**  
5 **Takroni<sup>2</sup>, Shaimaa K. Fathalla<sup>3</sup>**

6 <sup>1</sup>Chemistry Department, Faculty of Science, Tanta University, Tanta, Egypt

7 <sup>2</sup>Chemistry Department, Faculty of Applied Science, Umm Al-Qura University, Saudi Arabia

8 <sup>3</sup>Chemistry Department, Faculty of Science, Taif University, Taif, Saudi Arabia

9 \* Corresponding author email: [hoda.elghamri@science.tanta.edu.eg](mailto:hoda.elghamri@science.tanta.edu.eg)

10

11 **Section S1 Catalytic oxidation of o-aminophenol (OAP)**

12

13 The phenoxazinone synthase like efficacy of the synthesized chelates have been evaluated by utilizing o-  
14 aminophenol (OAP) as the paradigm substrate in dimethyl formamide medium at room temperature. For  
15 this study,  $3 \times 10^{-5}$  M solution of each complex have been firstly treated with  $10^{-2}$  M of the substrate o-  
16 aminophenol under aerobic environment. The catalytic reactions have been followed up by the UV-Vis  
17 spectral recording of the increase in the absorbance peak of the product 2-amino-phenoxazine-3-one  
18 (APX) in the range 430-435 nm upon mixing as a function of time at 5 min time intervals this is up to  $\approx$   
19 80 minutes. The initial rate method was used to determine the rate of reaction from the slope of the  
20 absorbance against time plot in the liner region [1]. The initial rate has been calculated using  $18300 \text{ M}^{-1}$   
21  $\text{cm}^{-1}$  as the molar absorptivity of the product 2-aminobenzoxazine-3-one [2, 3].

22 Kinetics of OAP oxidation were studied and explained by observation and recording the increase of  
23 phenoxazinone spectral band at 431 nm. The investigated materials under interest illustrated saturation  
24 kinetics, and the obtained results were treated applying the Michaelis-Menten model which looks suitable  
25 for the obtained results. The Michaelis constant ( $K_M$ , M), maximum reaction velocity ( $V_{max}$ ,  $\text{M min}^{-1}$ ),

1 specificity constant ( $k_{\text{cat}}/K_M$  in  $M^{-1} h^{-1}$ ), and rate constant for substrates dissociation (i.e. turnover number;  
2  $k_{\text{cat}}$ ,  $h^{-1}$ ) were calculated for all synthesized compounds.

3

4

5

6

7

8

9

10

11

12

13

14

15

16

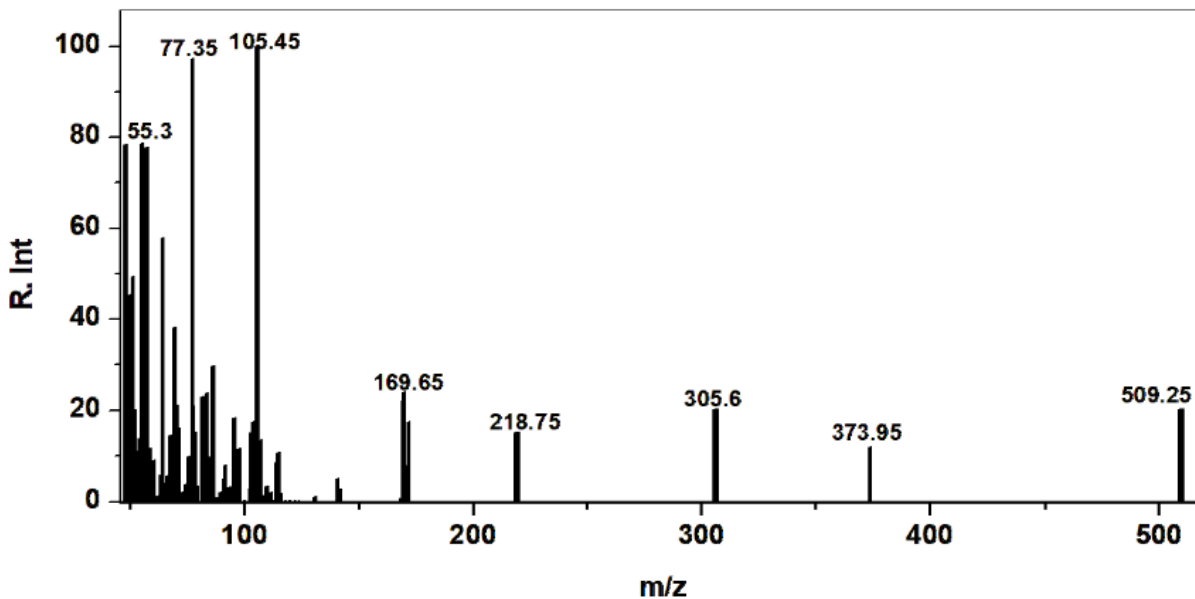

Fig. S1. Mass spectra of PANH-Cr chelate

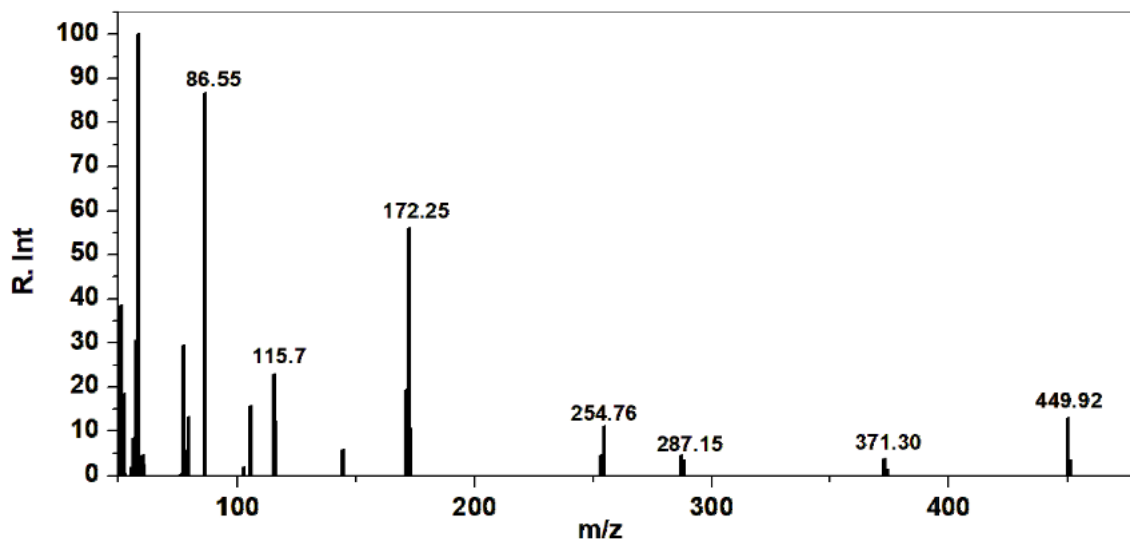

Fig. S2. Mass spectra of PANH-Co chelate

1  
2  
3  
4  
5  
6  
7  
8  
9  
10  
11  
12  
13  
14  
15  
16  
17  
18

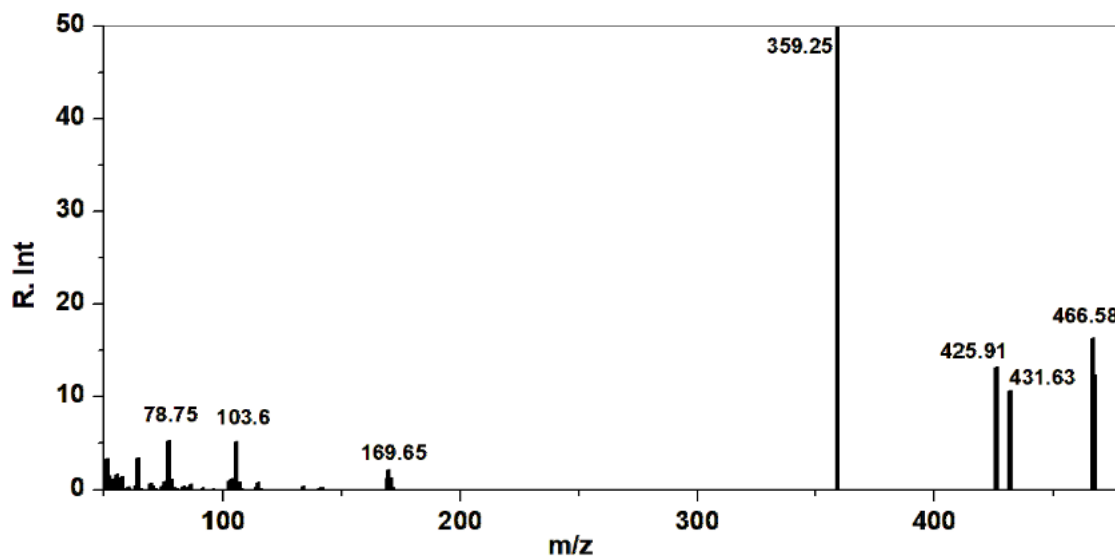

Fig. S3. Mass spectra of PANH-Ni chelate

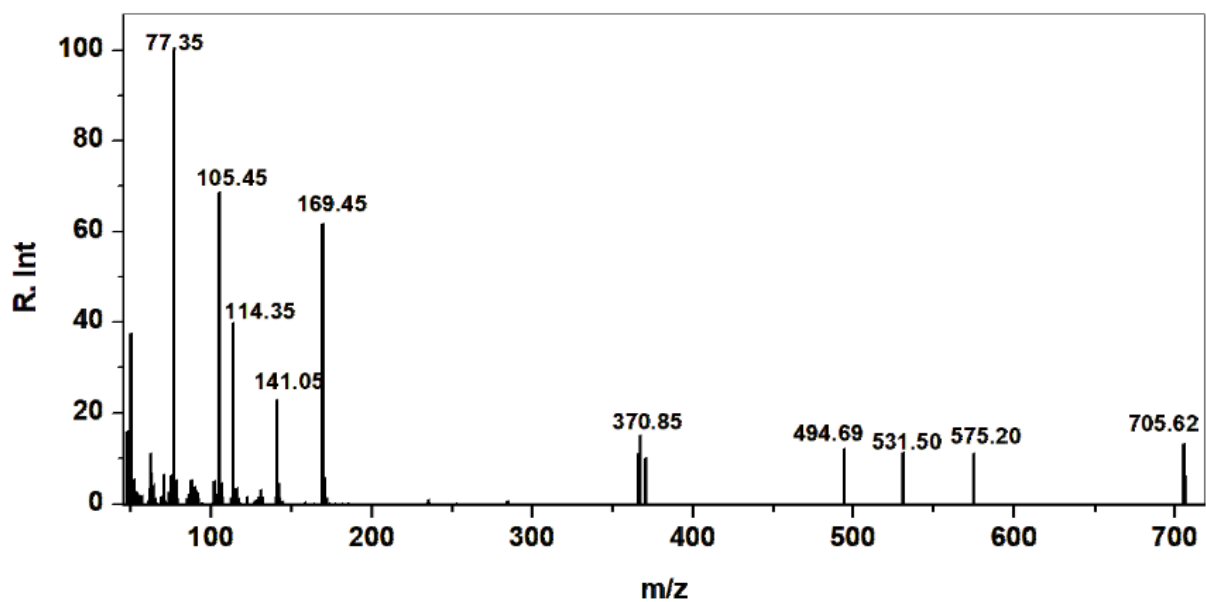

Fig. S4. Mass spectra of PANH-Cu chelate

1

2

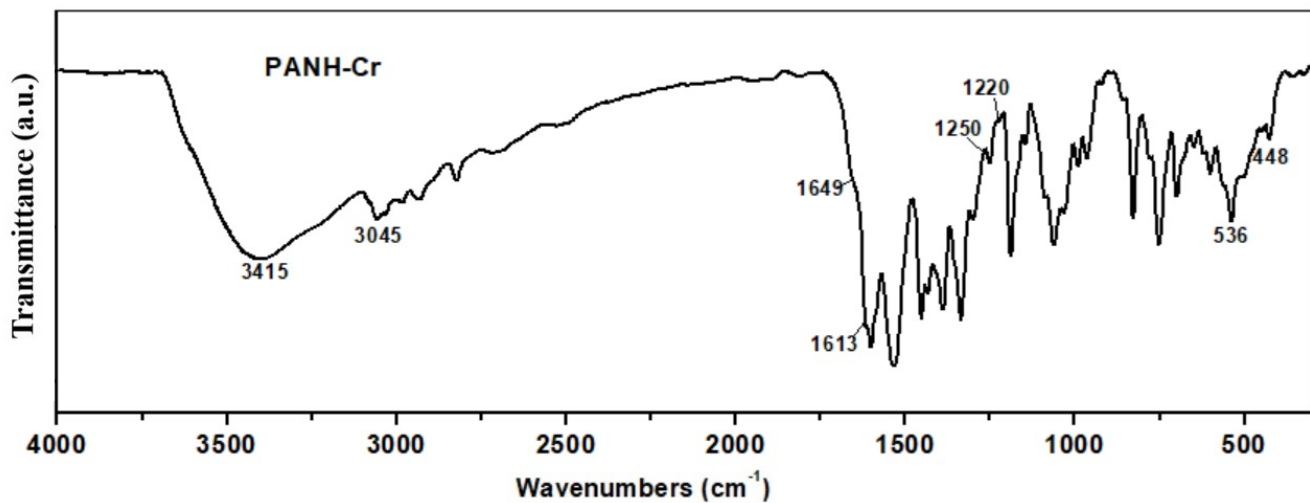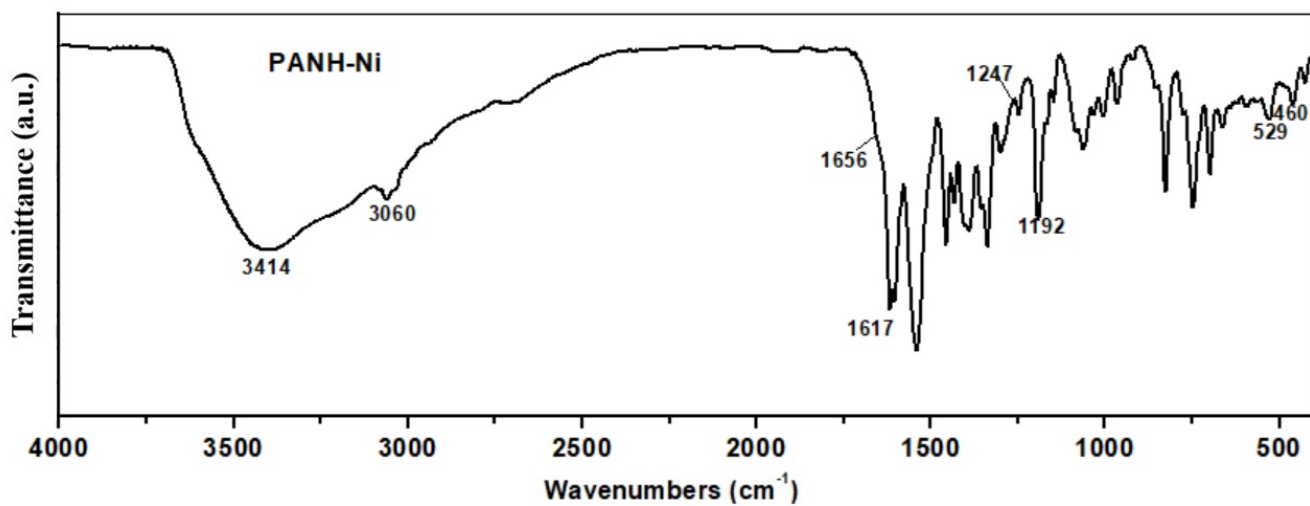

1  
2  
3  
4  
5  
6  
7  
8

**Fig. S5.** IR spectra of PANH-Cr & PANH-Ni complexes

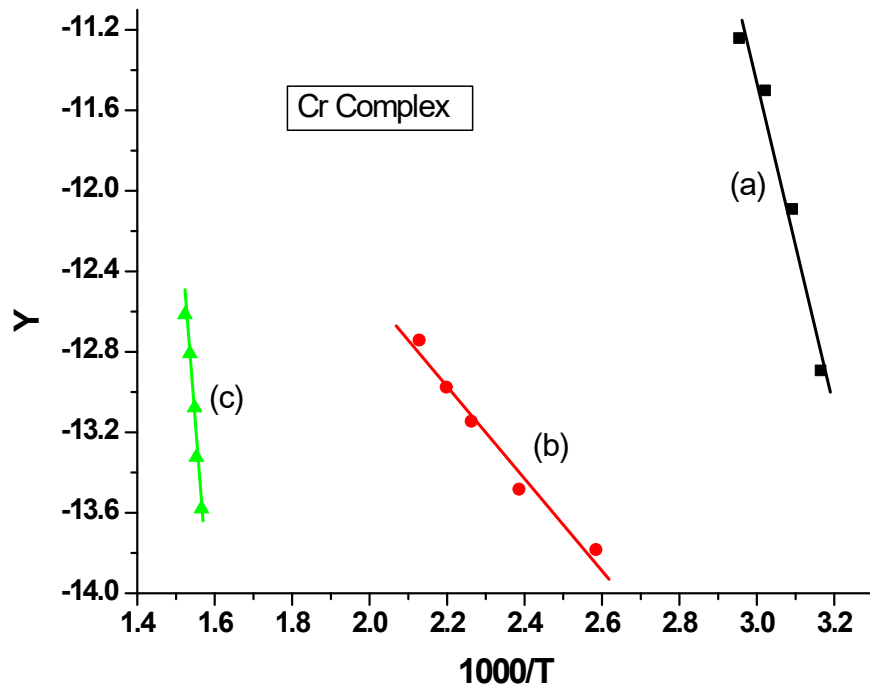

**Fig. S6.** Coats-Redfern plot for **PANH-Cr** complex.

a) first step b) second step c) third step

where,  $Y = [-\ln(1 - \alpha)] / T^2$  for  $n = 1$

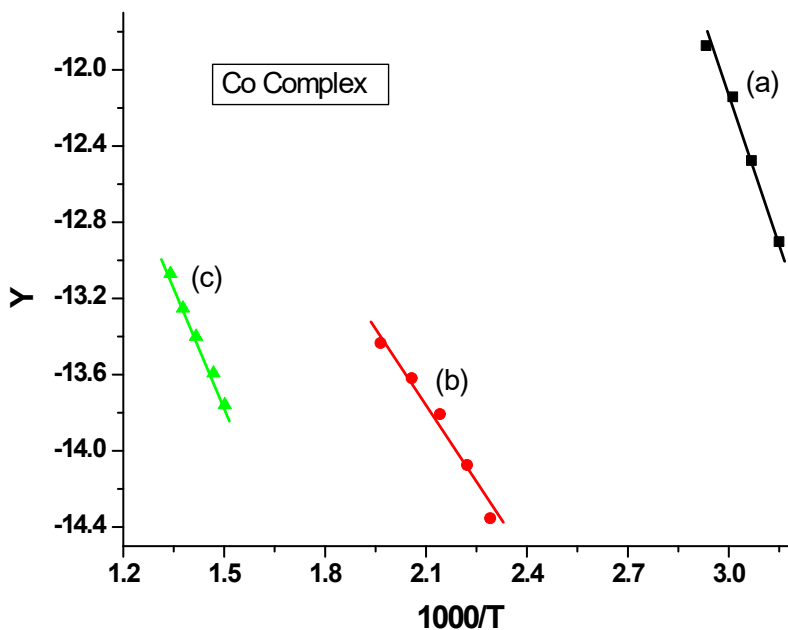

**Fig. S7.** Coats-Redfern plot for **PANH-Co** complex.

a) first step b) second step c) third step

where,  $Y = [1 - (1 - \alpha)^{1-n}] / (1-n) T^2$  for  $n \neq 1$  or  $Y = [-\ln(1 - \alpha)] / T^2$  for  $n = 1$

1

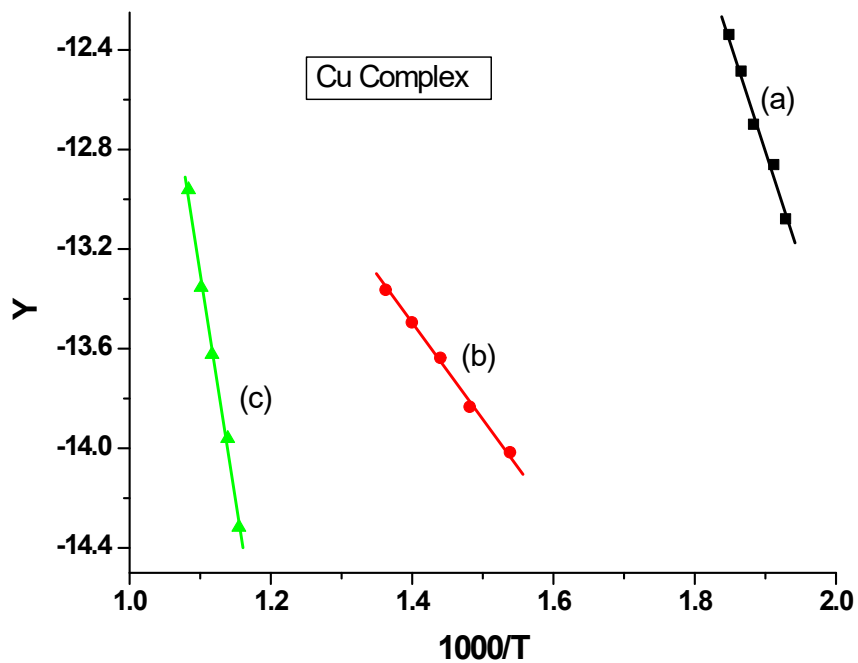

2  
3  
4 **Fig. S8.** Coats-Redfern plot for **PANH-Cu** complex.

5 a) first step b) second step c) third step

6 where,  $Y = [1 - (1 - \alpha)^{1-n}] / (1-n) T^2$  for  $n \neq 1$  or  $Y = [-\ln(1 - \alpha)] / T^2$  for  $n = 1$

7  
8  
9  
10  
11  
12  
13  
14  
15  
16  
17  
18  
19  
20  
21  
22  
23  
24  
25  
26

1  
2  
3  
4  
5  
6  
7  
8  
9  
10  
11  
12  
13  
14  
15  
16  
17  
18  
19  
20  
21  
22  
23  
24  
25  
26

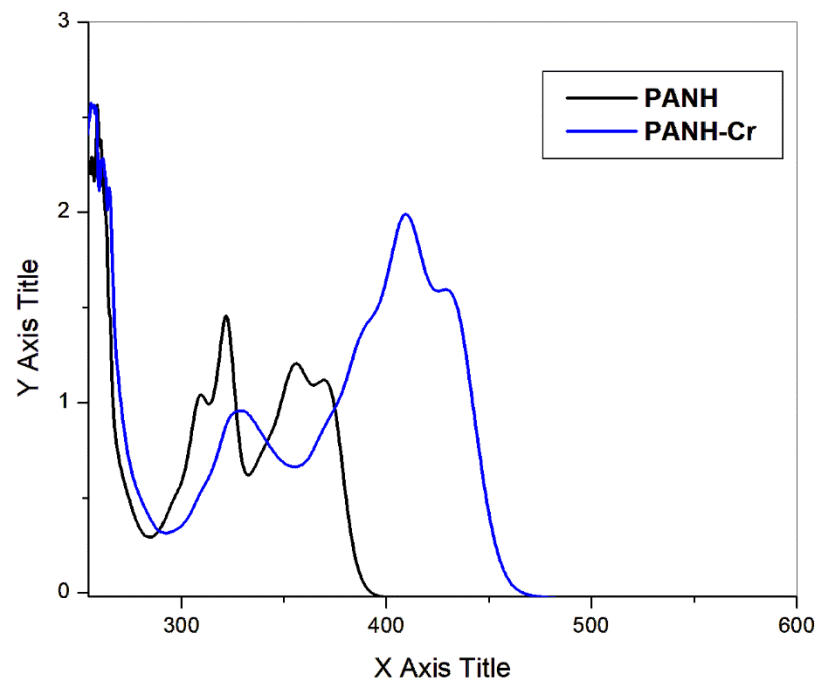

**Fig. S9.** UV-Vis spectra of PANH ligand and its Cr complex

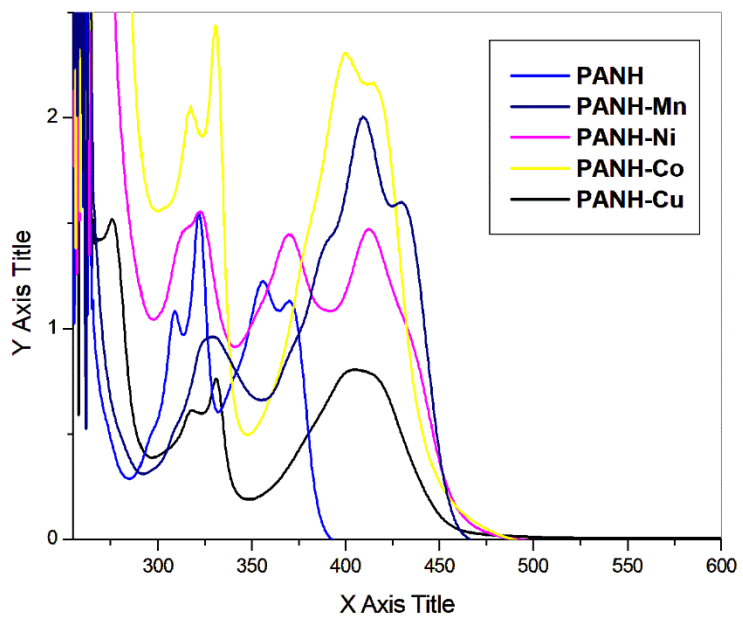

**Fig. S10.** UV-Vis spectra of PANH ligand and its Cr complex



- 1 [1] H. O. Oloyede, J. A. O. Woods, H. Görls, W. Plass, A. O. Eseola, The necessity of free and uncrowded  
2 coordination environments in biomimetic complex models: oxidative coupling by mixed-ligand cobalt(ii)  
3 complexes of diazene-disulfonamide, *New J. Chem.* **2019**, *43*, 18322.
- 4 [2] L. Gasque, A. Mendieta, G. Ferrer-Sueta, Comment on “Mixed azido/phenoxido bridged trinuclear  
5 Cu(II) complexes of Mannich bases: synthesis, structures, magnetic properties and catalytic oxidase  
6 activities”, *Dalton Trans.*, 2018, 47, 9385 and “Tri- and hexa-nuclear Ni<sup>II</sup>–Mn<sup>II</sup> complexes of a N<sub>2</sub>O<sub>2</sub> donor  
7 unsymmetrical ligand: synthesis, structures, magnetic properties and catalytic oxidase activities”, *Dalton*  
8 *Trans.*, 2018, 47, 13957, *Dalton Trans.* **2020**, *49*, 3365.
- 9 [3] N. Podder, S. Mandal, Aerobic Oxidation of 2-Aminophenol Catalysed by a Series of Mononuclear  
10 Copper(II) Complexes: Phenoxazinone Synthase-like Activity and Mechanistic Study, *New J. Chem.*  
11 **2020**, *44*, 12793.

12
